# Supplementary material
Source: PubMed Central journal article supplement (PMC11029514)
Supplement: 262_2013_1492_MOESM1_ESM.pdf [file 262_2013_1492_MOESM1_ESM.pdf]

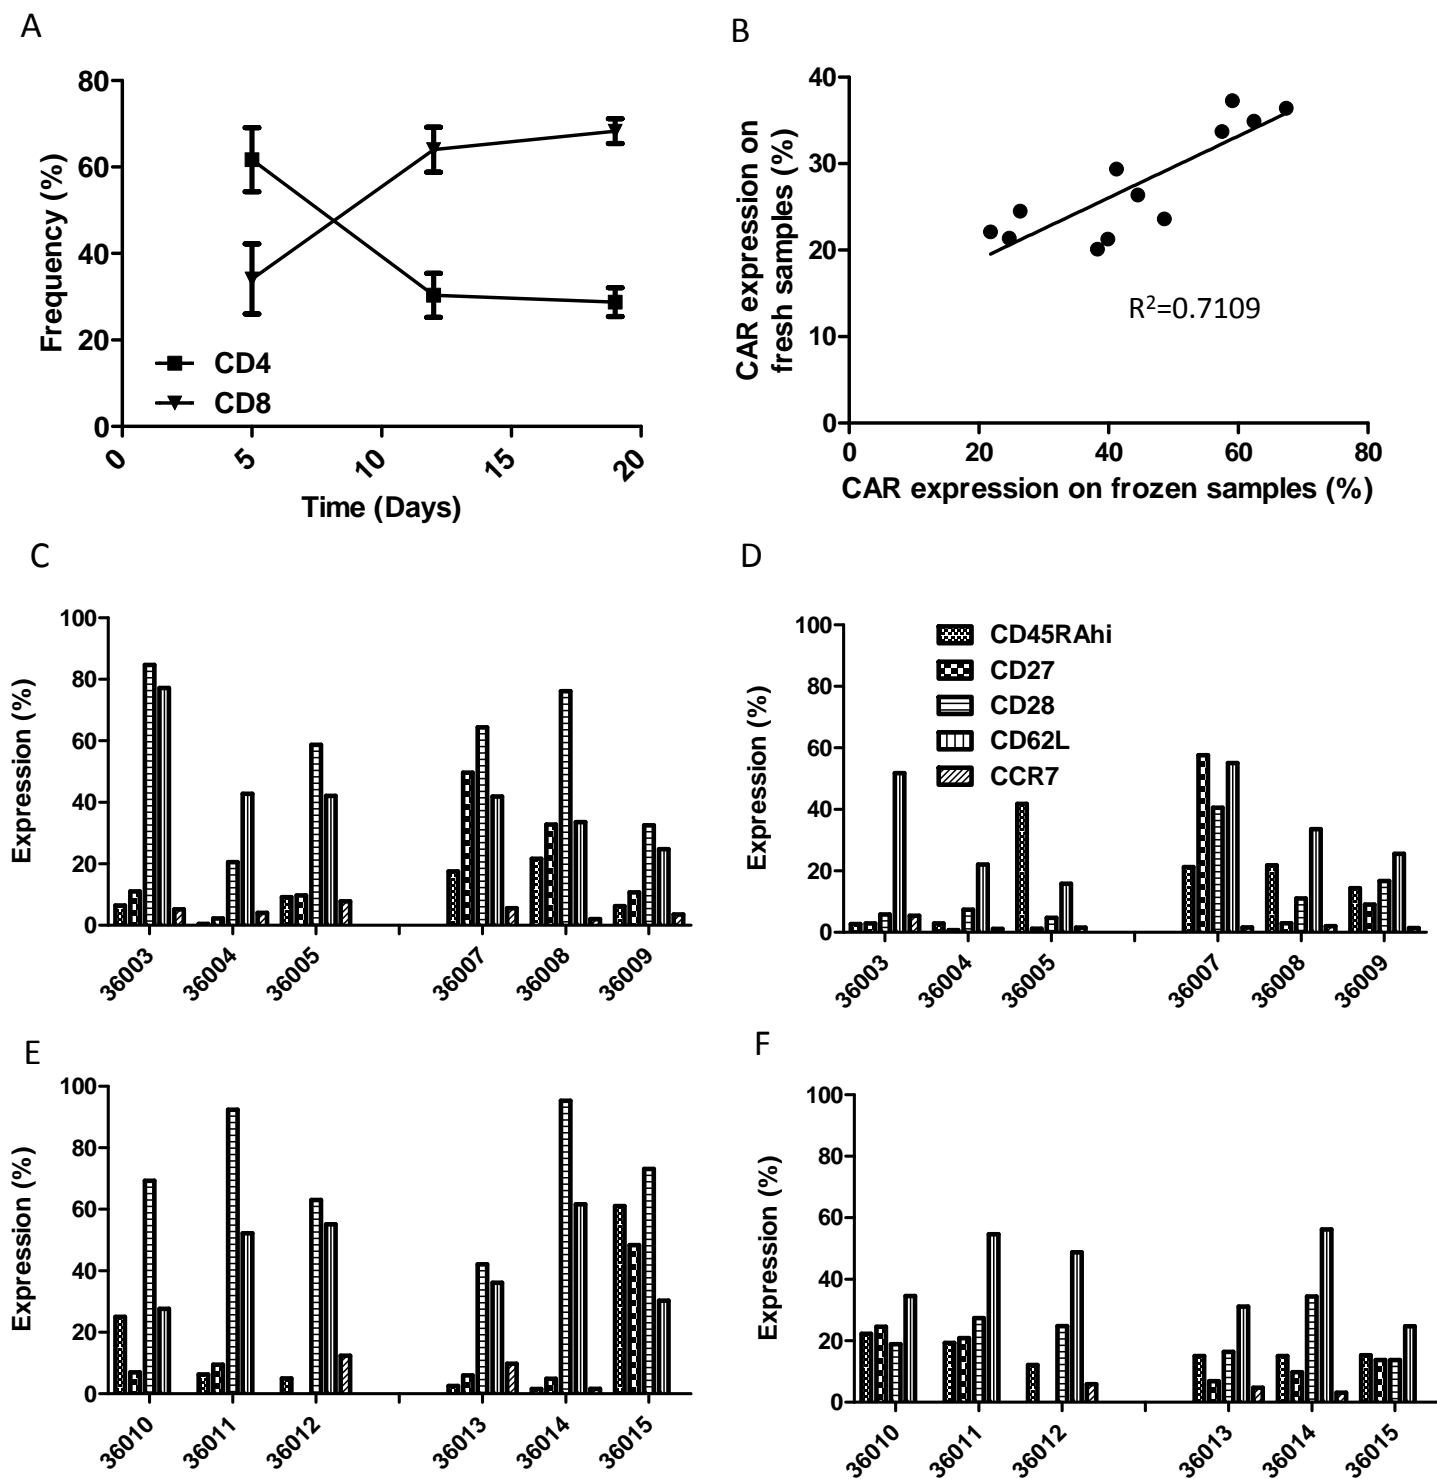

**Supplementary Figure 1**

(A) Three normal healthy donor buffy coats were used as a source of T-cells after a two day activation using anti-CD3 $\epsilon$  and IL-2. The activated T-cells were harvested and transduced with MFE $\zeta$  retroviral vector before further culture. At time points, CD4/CD8 subset frequency was determined by flow cytometry. (B) Plot of MFE $\zeta$  CAR expression on fresh and frozen / thawed samples ( $r^2=0.7109$ ). Relative expression of CD45RAhi, CD27, CD28, CD62L and CCR7 in (C, E) CD4+ and (D, F) CD8+ MFE $\zeta$  patient T-cells.

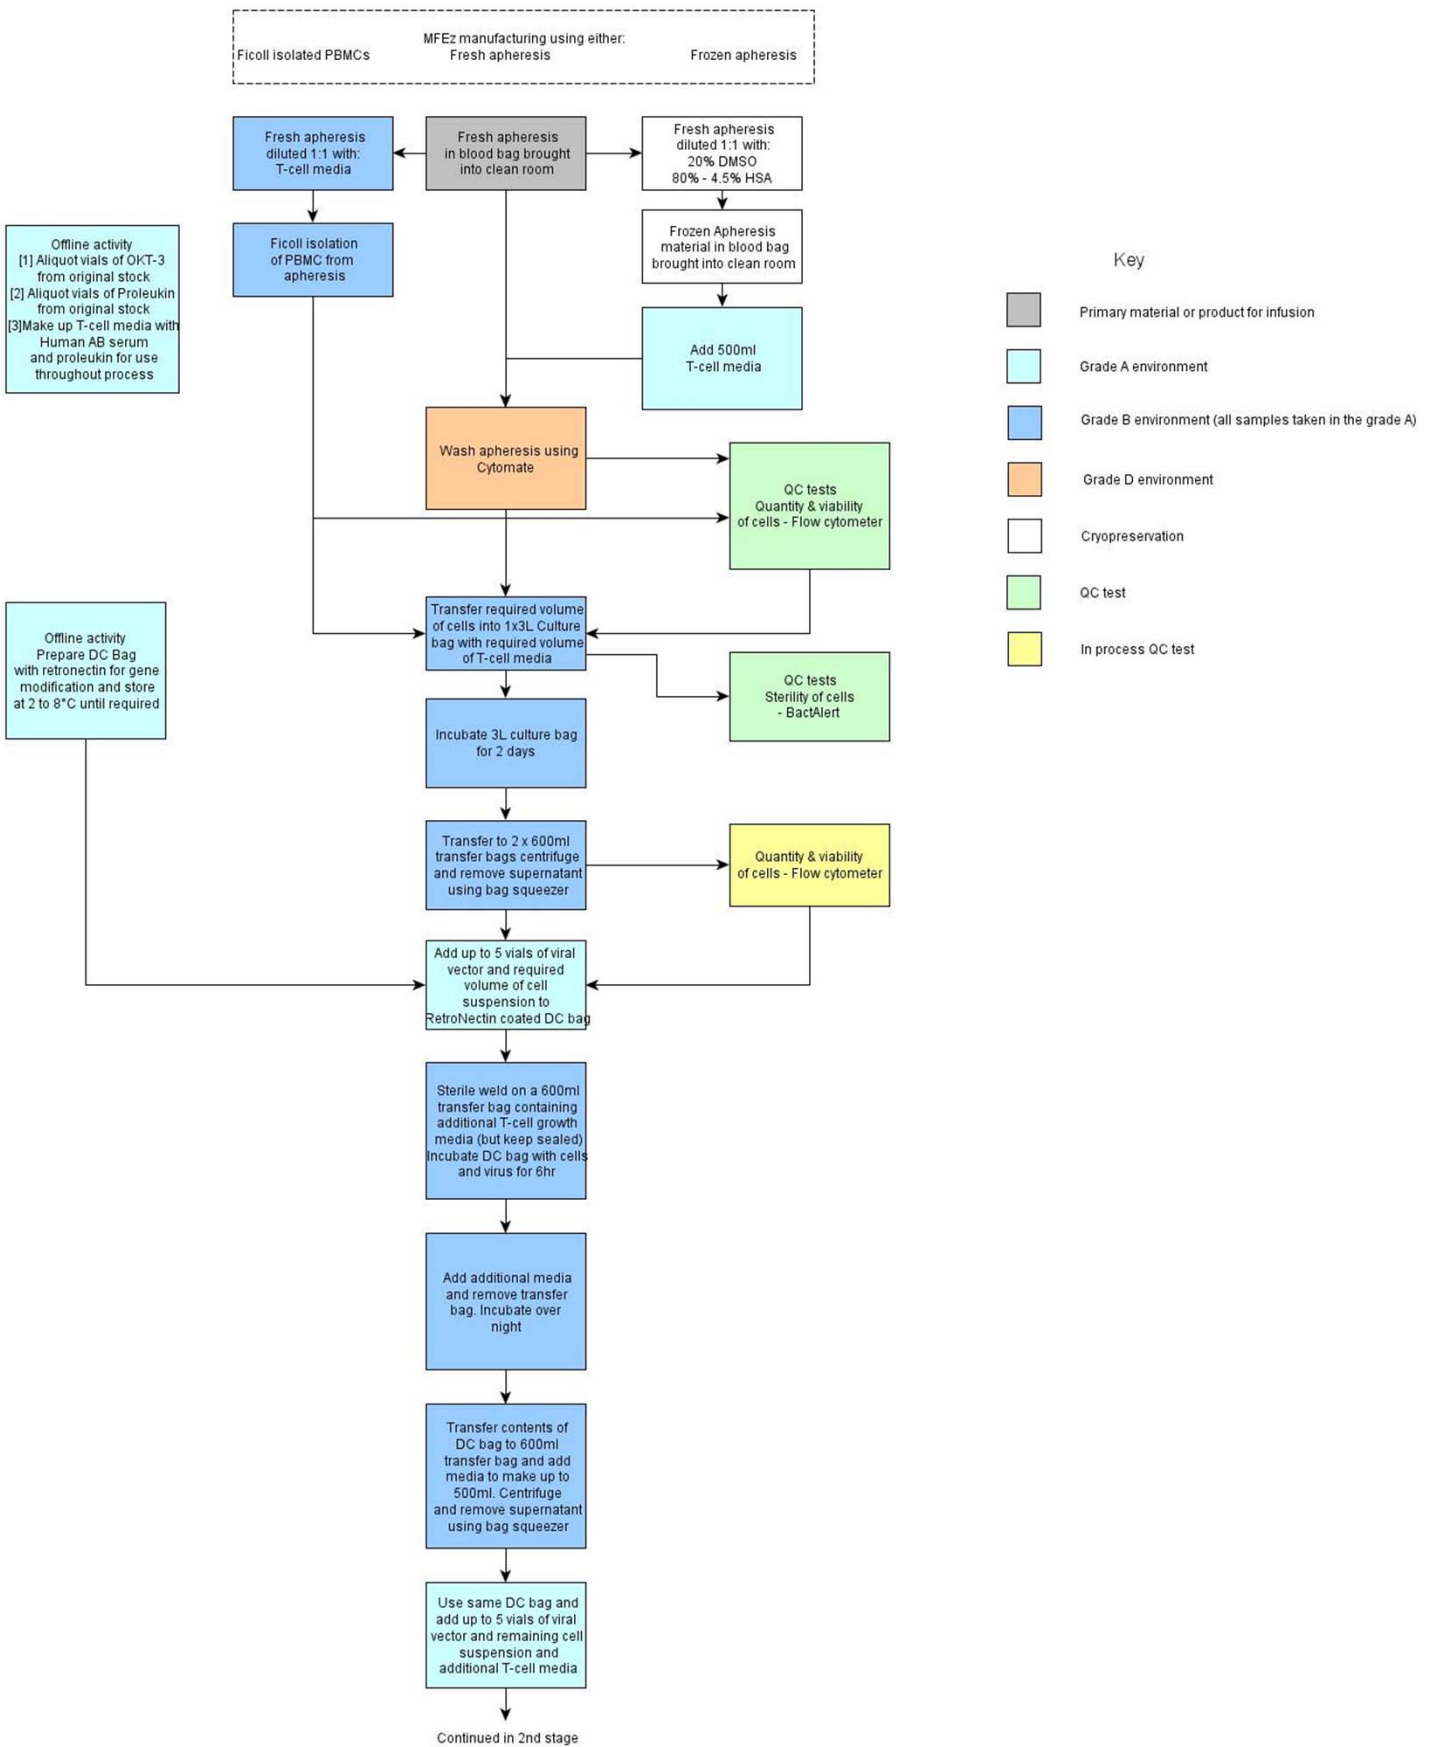

**Supplementary Figure 2 – Part 1**

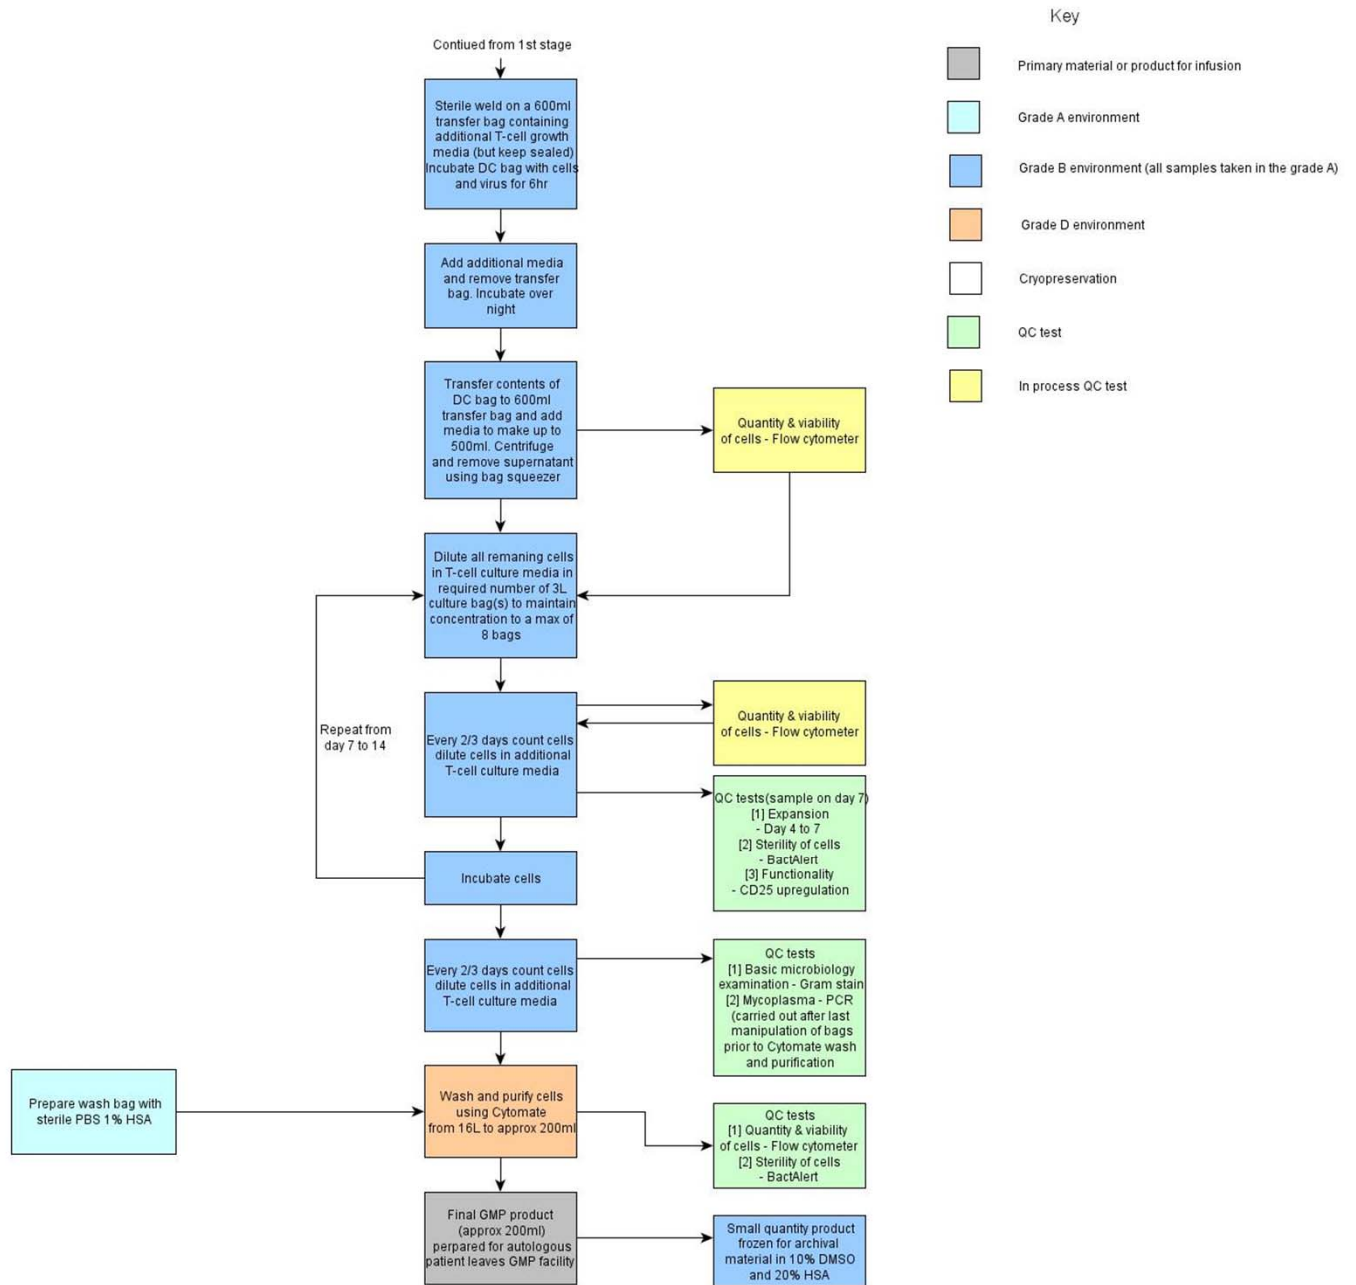

**Supplementary Figure 2 – Part 2**  
**Overview of the process used to generate MFE $\zeta$  T-cells**

**Supplemental Table 1**  
**Results from Quality Control testing of Master Cell Bank & End of Production**  
**Cells, PGMP15.**

| <b>Quality Control Tests Master Cell Bank, PGMP15</b>             |                                                                                                                                                                                                                                                                                                                                                                                                                                                                                                                                                                                                        |                                                                           |
|-------------------------------------------------------------------|--------------------------------------------------------------------------------------------------------------------------------------------------------------------------------------------------------------------------------------------------------------------------------------------------------------------------------------------------------------------------------------------------------------------------------------------------------------------------------------------------------------------------------------------------------------------------------------------------------|---------------------------------------------------------------------------|
| <b>Parameter</b>                                                  | <b>Acceptance Criteria</b>                                                                                                                                                                                                                                                                                                                                                                                                                                                                                                                                                                             | <b>Result</b>                                                             |
| Recovery of cells after thawing                                   | 10% confluence is reached after 2 days                                                                                                                                                                                                                                                                                                                                                                                                                                                                                                                                                                 | 45% confluence was reached after 2 days                                   |
| Titre of the produced supernatant                                 | > 5×10 <sup>5</sup> infectious particles per ml supernatant                                                                                                                                                                                                                                                                                                                                                                                                                                                                                                                                            | A titer of 1.3 x 10 <sup>6</sup> infectious particles / ml was calculated |
| Presence of the MFEζ transgene                                    | MFEζ detectable by flow cytometry                                                                                                                                                                                                                                                                                                                                                                                                                                                                                                                                                                      | The MFEζ transgene could be detected                                      |
| <b>Safety Tests</b>                                               |                                                                                                                                                                                                                                                                                                                                                                                                                                                                                                                                                                                                        |                                                                           |
| Sterility of the cells (Bactec, 14 day culture)                   | No growth                                                                                                                                                                                                                                                                                                                                                                                                                                                                                                                                                                                              | No microbial growth was observed                                          |
| Identity of the cells via <i>env</i> -specific PCR                | Negative for amphotropic and ecotropic and positive for GALV <i>envelope</i> sequences                                                                                                                                                                                                                                                                                                                                                                                                                                                                                                                 | Pass                                                                      |
| Identity of the cells via species PCR analysis                    | Positive for murine and negative for primate, rat or hamster beta globin sequences                                                                                                                                                                                                                                                                                                                                                                                                                                                                                                                     | Pass                                                                      |
| Detection of mouse virus via mouse antibody production (MAP) test | Following mouse viruses are undetectable: <ul style="list-style-type: none"> <li>• Ectromelia Virus</li> <li>• Hantaan Virus</li> <li>• K Virus</li> <li>• Lymphocytic Choriomeningitis Virus</li> <li>• Minute Virus</li> <li>• Adenovirus</li> <li>• Cytomegalovirus,</li> <li>• Encephalomyelitis Virus (Theiler's, GDVII)</li> <li>• Hepatitis Virus</li> <li>• Rotavirus (EDIM),</li> <li>• Pneumonia Virus</li> <li>• Polyoma Virus</li> <li>• Reovirus Type 3</li> <li>• Sendai Virus</li> <li>• Thymic Virus,</li> <li>• Mycoplasma Pulmonis,</li> <li>• Lactic Dehydrogenase Virus</li> </ul> | Pass                                                                      |
| Test for bovine virus via coculture with KL-2 cells               | CPE, hemadsorbition and hemagglutination undetectable using cells from the MCB. Positive and negative control to                                                                                                                                                                                                                                                                                                                                                                                                                                                                                       | Pass                                                                      |
| Test for porcine virus via coculture with PK-13 cells             |                                                                                                                                                                                                                                                                                                                                                                                                                                                                                                                                                                                                        | Pass                                                                      |
| Test for adventitious virus                                       |                                                                                                                                                                                                                                                                                                                                                                                                                                                                                                                                                                                                        | Pass                                                                      |

|                                                                          |                                                                                                                          |                                                                                                                                                                                                                                                                                                                                                                                    |
|--------------------------------------------------------------------------|--------------------------------------------------------------------------------------------------------------------------|------------------------------------------------------------------------------------------------------------------------------------------------------------------------------------------------------------------------------------------------------------------------------------------------------------------------------------------------------------------------------------|
| via coculture with Vero cells                                            | demonstrate the validity of the assay                                                                                    |                                                                                                                                                                                                                                                                                                                                                                                    |
| Test for adventitious virus via coculture with MRC-5 cells               |                                                                                                                          | Pass                                                                                                                                                                                                                                                                                                                                                                               |
| Test for replication competent retroviruses (RCR) via extended S+L-assay |                                                                                                                          | Pass                                                                                                                                                                                                                                                                                                                                                                               |
| Test for bovine Polyomavirus via PCR                                     | Bovine polyomaviruses sequences are undetectable                                                                         | No virus detectable                                                                                                                                                                                                                                                                                                                                                                |
| Test for mycoplasma via indicator cell culture and culture method        | No detectable mycoplasma by co-culture in solid and liquid media as well as by fluorescence staining of indicator cells. | No mycoplasma detectable                                                                                                                                                                                                                                                                                                                                                           |
| <b>Quality Control Tests for End of Production Cells</b>                 |                                                                                                                          |                                                                                                                                                                                                                                                                                                                                                                                    |
| <b>Parameter</b>                                                         | <b>Acceptance Criteria</b>                                                                                               | <b>Result</b>                                                                                                                                                                                                                                                                                                                                                                      |
| Functionality (Cellular Assay / FACS analysis)                           | MFE $\zeta$ detectable                                                                                                   | The MFE $\zeta$ transgene was detected                                                                                                                                                                                                                                                                                                                                             |
| <b>Safety Tests</b>                                                      |                                                                                                                          |                                                                                                                                                                                                                                                                                                                                                                                    |
| Sterility (BacTec system)                                                | No microbial growth                                                                                                      | No microbial growth was observed                                                                                                                                                                                                                                                                                                                                                   |
| RCR (PG4 S+L-)                                                           | No RCR detectable                                                                                                        | No Cytopathic effect (CPE) was detected when the EPCs were used. A distinct CPE was detected when at least 0.37 TCID <sub>50</sub> where incubated with the test article and the detector cell line.<br><br>No CPE was detected when the EPCs were used. A distinct CPE was detected when at least 1.9 TCID <sub>50</sub> where incubated with the test article and the 293 cells. |

**Supplemental Table 2****Results for MFE $\zeta$  Retroviral Vector**

| <b>Test</b>                                         | <b>Acceptance Criteria</b>          | <b>Results</b>                                                                                                                                                                                                                                                                                                                                                                                                                          |
|-----------------------------------------------------|-------------------------------------|-----------------------------------------------------------------------------------------------------------------------------------------------------------------------------------------------------------------------------------------------------------------------------------------------------------------------------------------------------------------------------------------------------------------------------------------|
| Titre (Cellular Assay / FACS analysis)              | Titre > 10 <sup>6</sup> cells / ml  | A titer of 1.0 x 10 <sup>7</sup> infectious particles / ml was calculated                                                                                                                                                                                                                                                                                                                                                               |
| Functionality (Cellular Assay / FACS analysis)      | MFE $\zeta$ detectable              | The MFE $\zeta$ transgene could be detected                                                                                                                                                                                                                                                                                                                                                                                             |
| Sterility (BacTec system)                           | No microbial growth                 | No microbial growth was observed                                                                                                                                                                                                                                                                                                                                                                                                        |
| Endotoxin (Culture assay according to EP)           | Endotoxin concentration < 5 EU / ml | The level of endotoxin potency in the supernatant was 0.24 EU/mL                                                                                                                                                                                                                                                                                                                                                                        |
| Mycoplasma (Semiquantitative assay according to EP) | No mycoplasma detectable            | No mycoplasma could be detected by co-culture in solid and liquid media as well as by fluorescence staining of indicator cells                                                                                                                                                                                                                                                                                                          |
| RCR (PG4 S+L-)                                      | No RCR detectable                   | No CPE was detected when the retroviral vector containing supernatant PGMP15 was used. A distinct CPE was detected when at least 31 TCID <sub>50</sub> were incubated with the test article and the detector cell line<br><br>No CPE was detected when the retroviral vector containing supernatant PGMP15 was used. A distinct CPE was detected when at least 31 TCID <sub>50</sub> were incubated with the test article and 292 cells |

**Supplemental Table 3****Justification of Specification for MFE $\zeta$  T cells**

| <b>Test</b>                                   | <b>Specification</b>                                                    | <b>Justification</b>                                                                                                                                                                                                                                                                             |
|-----------------------------------------------|-------------------------------------------------------------------------|--------------------------------------------------------------------------------------------------------------------------------------------------------------------------------------------------------------------------------------------------------------------------------------------------|
| Retroviral titre                              | > 10 <sup>5</sup> infectious MFE $\zeta$ retroviral vector particles/ml | A minimum of infectious vector particles/ml is necessary to achieve an effective transduction rate leading to the anticipated functionality of the cells.                                                                                                                                        |
| Functionality of MFE $\zeta$ -transgene       | MFE $\zeta$ -protein is detectable on cell surface by FACS              | The expression of the transgene product MFE $\zeta$ on the surface of the cells is a prerequisite for the detection of cancer-related antigens. Absence of expression or inability to bind the bCEA antigen would indicate mutations in the vector which would abolish the anticipated function. |
| Sterility                                     | No detectable microbial growth in Bactec cultures                       | Drug substance should be without bacterial contaminants.                                                                                                                                                                                                                                         |
| Bovine, porcine, murine, adventitious viruses | No virus detectable                                                     | Drug substance should be without viral contamination.                                                                                                                                                                                                                                            |
| RCR                                           | No RCR detectable                                                       | Drug substance should be without RCR contamination.                                                                                                                                                                                                                                              |
| Mycoplasma                                    | No mycoplasma detectable                                                | Drug substance should be without mycoplasma contamination.                                                                                                                                                                                                                                       |
| Endotoxin                                     | < 5 EU/ml                                                               | High Endotoxin levels would indicate bacterial contamination. Because drug product will not be tested individually for Endotoxin levels, all raw materials for manufacturing of drug product should be tested for Endotoxin.                                                                     |

**Supplemental Table 4.**  
**Summary of Pre-release and Final product release criteria for MFE $\zeta$  T cells**

| <b>Day 7 Pre-Release Certification</b> | <b>Threshold values</b>                                                                                                                                                                                              | <b>Notes</b>                                                                                                                                                                                                                                      |
|----------------------------------------|----------------------------------------------------------------------------------------------------------------------------------------------------------------------------------------------------------------------|---------------------------------------------------------------------------------------------------------------------------------------------------------------------------------------------------------------------------------------------------|
| Fold expansion                         | $\geq 2.5$ fold expansion in cell number by day 7                                                                                                                                                                    | Fold expansion determined by the comparison of day 7 cell counts with day 4 counts (post transduction). Studies with normal donor T-cells suggested that an expansion of $< 2.5$ fold would result in less than $10^9$ total cells after culture. |
| Transgene Expression                   | $\geq 20\%$ expression of the MFE $\zeta$ CAR on CD3 <sup>+</sup> 7-AAD <sup>-</sup> cells.                                                                                                                          | The level of 20% was arbitrarily set based upon in vitro studies of MFE $\zeta$ function (Gilham et al. J. Immunotherapy 2002).                                                                                                                   |
| Sterility                              | No microbiological growth                                                                                                                                                                                            | 48 hour culture in BactAlert aerobic and anaerobic culture bottles.                                                                                                                                                                               |
| <b>Final Product Release Criteria</b>  | <b>Threshold values</b>                                                                                                                                                                                              | <b>Notes</b>                                                                                                                                                                                                                                      |
| T-cell dose                            | $1 \times 10^9 - 5 \times 10^{10}$ viable T-cells                                                                                                                                                                    | Dose required dependent upon cohort.                                                                                                                                                                                                              |
| T-cell viability                       | $\geq 50\%$ viable cells (CD3 <sup>+</sup> , Annexin-V <sup>-</sup> , 7-AAD <sup>-</sup> ).                                                                                                                          |                                                                                                                                                                                                                                                   |
| Transgene Expression                   | $\geq 20\%$ expression of the MFE $\zeta$ CAR on CD3 <sup>+</sup> 7-AAD <sup>-</sup> cells.                                                                                                                          |                                                                                                                                                                                                                                                   |
| Functionality                          | $\geq 2$ fold increase in CD25 up-regulation by MFE $\zeta$ T-cells induced by CEA over unstimulated MFE $\zeta$ T-cells                                                                                             |                                                                                                                                                                                                                                                   |
| Sterility                              | <ul style="list-style-type: none"> <li>- Microbial cultures negative day 0 and day 7</li> <li>- No visible bacteria by Gram stain of samples from all culture bags.</li> <li>- Mycoplasma negative by PCR</li> </ul> | <p>BactAlert cultures</p> <p>PCR methods used rather than culture for speed of results.</p>                                                                                                                                                       |
